# Supplementary material for: Higher Blood Pressure during Endovascular Thrombectomy in Anterior Circulation Stroke Is Associated with Better Outcomes
Source: PubMed Central journal article supplement — J Stroke. 2018 Sep 30;20(3):373–84. doi: 10.5853/jos.2018.01305 (PMC6186925; doi:10.5853/jos.2018.01305), 2018-09-30
Supplement: jos-2018-01305-suppl1.pdf [file jos-2018-01305-suppl1.pdf]

**Supplementary Table 1.** Routine laboratory test results taken on admission or within 24 hours, overall and by mRS score at 3 months

| Variable                                      | All patients     | mRS 0–2          | mRS 3–6          | Missing mRS      |
|-----------------------------------------------|------------------|------------------|------------------|------------------|
| Number                                        | 164              | 75               | 80               | 9                |
| Serum creatinine ( $\mu\text{mol/L}$ )        | 77 (16–249)      | 76 (40–126)      | 85 (16–249)      | 73 (50–93)       |
| Serum glucose (mmol/L)                        | 6.6 (4.5–15.5)   | 6.2 (4.5–10.3)   | 7.1 (5.3–15.5)   | 6.4 (4.8–9.7)    |
| Total cholesterol (mmol/L)                    | 4.1 (2.0–7.8)    | 4.3 (2.5–6.4)    | 3.7 (2.0–7.8)    | 4.7 (2.8–5.2)    |
| HDL-C (mmol/L)                                | 1.1 (0.31–2.8)   | 1.1 (0.47–2.4)   | 1.1 (0.31–2.2)   | 1.7 (0.80–2.3)   |
| LDL-C (mmol/L)                                | 2.4 (0.52–4.7)   | 2.8 (0.59–4.5)   | 2.1 (0.52–4.7)   | 2.2 (1.7–3.9)    |
| Triglycerides (mmol/L)                        | 1.17 (0.34–4.55) | 1.12 (0.46–4.55) | 1.23 (0.34–3.23) | 1.16 (0.56–2.08) |
| Fibrinogen ( $\mu\text{mol/L}$ )              | 9.9 (2.9–23.1)   | 9.9 (3.7–17.0)   | 10.0 (2.9–23.1)  | 10.3 (7.5–11.6)  |
| C-reactive protein (mg/L)                     | 0.36 (0.01–9.85) | 0.29 (0.01–8.65) | 0.46 (0.04–9.85) | 0.38 (0.07–1.79) |
| Red blood cells ( $\times 10^{12}/\text{L}$ ) | 4.4 (2.8–5.7)    | 4.5 (3.4–5.4)    | 4.2 (2.8–5.7)    | 4.6 (3.9–5.1)    |
| Hematocrit (%)                                | 39.1 (24.8–52.1) | 39.5 (24.9–46.4) | 37.9 (24.6–52.1) | 41.1 (35.4–45.6) |
| Platelets ( $\times 10^9/\text{L}$ )          | 220 (67–572)     | 229 (67–572)     | 212 (101–431)    | 224 (174–286)    |
| White blood cells ( $\times 10^9/\text{L}$ )  | 8.1 (3.0–70.9)   | 8.2 (3.0–70.9)   | 8.4 (3.2–27.2)   | 7.4 (6.0–10.1)   |

Values are presented as median (interquartile range).

mRS, modified Rankin Scale; HDL-C, high density lipoprotein cholesterol; LDL-C, low density lipoprotein cholesterol.
