# Supplementary material for: Higher Blood Pressure during Endovascular Thrombectomy in Anterior Circulation Stroke Is Associated with Better Outcomes
Source: PubMed Central journal article supplement — J Stroke. 2018 Sep 30;20(3):373–84. doi: 10.5853/jos.2018.01305 (PMC6186925; doi:10.5853/jos.2018.01305), 2018-09-30
Supplement: jos-2018-01305-suppl2.pdf [file jos-2018-01305-suppl2.pdf]

**Supplementary Table 2.** Absolute (minutes) and relative (%) time spent with SBP and MAP >120% or <80% of the reference value, overall and by mRS score at 3 months

| Variable                     | All patients | mRS 0–2     | mRS 3–6     | Missing mRS |
|------------------------------|--------------|-------------|-------------|-------------|
| Number                       | 164          | 75          | 80          | 9           |
| SBP >120% of reference (min) | 8.6 (0–158)  | 8.6 (0–84)  | 8.6 (0–158) | 7.3 (0–59)  |
| MAP >120% of reference (min) | 9.5 (0–223)  | 9.2 (0–127) | 9.7 (0–223) | 10.7 (0–63) |
| SBP <80% of reference (min)  | 8.9 (0–152)  | 9.0 (0–143) | 8.9 (0–152) | 7.6 (0–9)   |
| MAP <80% of reference (min)  | 7.2 (0–160)  | 7.8 (0–75)  | 7.3 (0–160) | 1 (0–1)     |
| SBP >120% of reference (%)   | 10.9 (0–93)  | 12.1 (0–93) | 9.3 (0–84)  | 16.3 (0–82) |
| MAP >120% of reference (%)   | 11.9 (0–97)  | 13.1 (0–89) | 10.3 (0–97) | 19.5 (0–88) |
| SBP <80% of reference (%)    | 9.6 (0–92)   | 12.3 (0–90) | 8.2 (0–92)  | 6.6 (0–9.6) |
| MAP <80% of reference (%)    | 7.8 (0–89)   | 10.6 (0–89) | 6.6 (0–82)  | 1 (0–1)     |

Values are presented as geometric mean (range).

SBP, systolic blood pressure; MAP, mean arterial pressure; mRS, modified Rankin Scale.
