# Supplementary material for: Higher Blood Pressure during Endovascular Thrombectomy in Anterior Circulation Stroke Is Associated with Better Outcomes
Source: PubMed Central journal article supplement — J Stroke. 2018 Sep 30;20(3):373–84. doi: 10.5853/jos.2018.01305 (PMC6186925; doi:10.5853/jos.2018.01305), 2018-09-30
Supplement: jos-2018-01305-suppl3.pdf [file jos-2018-01305-suppl3.pdf]

**Supplementary Table 3.** Relationship between BP/BP excursions during EVT to values exceeding  $\pm 20\%$  of the reference value and ischemic lesion volume (computed tomography scans)

| Model                                                | Systolic blood pressure |       | Mean arterial pressure |       |
|------------------------------------------------------|-------------------------|-------|------------------------|-------|
|                                                      | GMR (95% CI)            | P     | GMR (95% CI)           | P     |
| <b>Full A: no interactions</b>                       |                         |       |                        |       |
| Default independent variables                        |                         |       |                        |       |
| Rate of BP >120% of reference (by 1/10 min)          | 0.78 (0.62–0.96)        | 0.021 | 0.79 (0.66–0.93)       | 0.006 |
| Rate of BP <80% of reference (by 1/10 min)           | 1.02 (0.83–1.26)        | 0.845 | 1.11 (0.89–1.39)       | 0.342 |
| Reference BP (by 10 mm Hg)                           | 1.00 (0.76–1.31)        | 0.989 | 0.79 (0.53–1.17)       | 0.242 |
| Procedure mean BP (by 10 mm Hg) <sup>†</sup>         | 0.92 (0.70–1.20)        | 0.538 | 1.06 (0.71–1.57)       | 0.772 |
| Procedure duration (by 10 min)                       | 1.01 (0.95–1.08)        | 0.764 | 1.02 (0.95–1.08)       | 0.639 |
| BP measurements taken (by 10)                        | 1.07 (0.98–1.17)        | 0.119 | 1.08 (0.99–1.17)       | 0.098 |
| On-admission NIHSS score (by 1 point)                | 1.05 (1.00–1.11)        | 0.037 | 1.05 (1.00–1.10)       | 0.036 |
| TICI grade 2b-3 (vs. 0-2a)                           | 0.46 (0.24–0.91)        | 0.026 | 0.51 (0.26–0.98)       | 0.044 |
| Affected vessel: MCA1 vs. MCA2                       | 0.71 (0.25–1.98)        | 0.508 | 0.81 (0.29–2.23)       | 0.677 |
| Affected vessel: MCA1 vs. tandem occlusion           | 0.70 (0.34–1.42)        | 0.316 | 0.73 (0.37–1.45)       | 0.371 |
| Collaterals $\geq 50\%$ as unaffected side (vs. no)  | 0.35 (0.17–0.74)        | 0.006 | 0.37 (0.18–0.76)       | 0.007 |
| Antihypertensives before EVT (vs. no)                | 1.41 (0.55–3.56)        | 0.471 | 1.30 (0.53–3.23)       | 0.565 |
| Selected independent variables <sup>‡</sup>          |                         |       |                        |       |
| Men (vs. women)                                      | 1.89 (1.08–3.32)        | 0.026 | 1.93 (1.11–3.34)       | 0.020 |
| Model fit statistics (-2ResLL, AIC, BIC)             | 682.44, 712.44, 757.60  |       | 674.54, 704.54, 749.70 |       |
| <b>Full B: with excursion*reference interactions</b> |                         |       |                        |       |
| Default independent variables                        |                         |       |                        |       |
| Rate of BP >120% of reference (by 1/10 min)          | 0.73 (0.57–0.92)        | 0.008 | 0.74 (0.58–0.93)       | 0.011 |
| Rate of BP <80% of reference (by 1/10 min)           | 1.11 (0.81–1.52)        | 0.500 | 1.16 (0.87–1.54)       | 0.317 |
| Reference BP (by 10 mm Hg)                           | 0.88 (0.66–1.16)        | 0.358 | 0.75 (0.49–1.14)       | 0.178 |
| Rate of BP excursions >120%*reference BP             | 0.86 (0.77–0.96)        | 0.008 | 0.96 (0.87–1.06)       | 0.404 |
| Rate of BP excursions <80%*reference BP              | 0.98 (0.92–1.04)        | 0.492 | 0.98 (0.91–1.07)       | 0.710 |
| Procedure mean BP (by 10 mm Hg) <sup>†</sup>         | 0.99 (0.75–1.29)        | 0.919 | 1.11 (0.74–1.67)       | 0.616 |
| Procedure duration (by 10 min)                       | 1.01 (0.95–1.07)        | 0.800 | 1.01 (0.95–1.08)       | 0.682 |
| BP measurements taken (by 10)                        | 1.06 (0.97–1.16)        | 0.171 | 1.07 (0.98–1.17)       | 0.109 |
| On-admission NIHSS score (by 1 point)                | 1.05 (1.00–1.10)        | 0.041 | 1.05 (1.00–1.10)       | 0.052 |
| TICI grade 2b-3 (vs. 0-2a)                           | 0.47 (0.24–0.92)        | 0.027 | 0.51 (0.26–0.99)       | 0.046 |
| Affected vessel: MCA1 vs. MCA2                       | 0.86 (0.31–2.40)        | 0.874 | 0.85 (0.30–2.37)       | 0.748 |
| Affected vessel: MCA1 vs. tandem occlusion           | 0.61 (0.30–1.24)        | 0.170 | 0.73 (0.36–1.45)       | 0.367 |
| Collaterals $\geq 50\%$ as unaffected side (vs. no)  | 0.37 (0.18–0.77)        | 0.008 | 0.37 (0.18–0.76)       | 0.007 |
| Antihypertensives before EVT (vs. no)                | 1.50 (0.60–3.76)        | 0.380 | 1.33 (0.53–3.32)       | 0.539 |
| Selected independent variables <sup>‡</sup>          |                         |       |                        |       |
| Men (vs. women)                                      | 1.88 (1.08–3.29)        | 0.026 | 1.91 (1.09–3.34)       | 0.024 |
| Model fit statistics (-2ResLL, AIC, BIC)             | 693.63, 727.63, 778.58  |       | 691.64, 725.64, 776.59 |       |
| <b>Full C: with excursions*TICI interactions</b>     |                         |       |                        |       |
| Rate of BP >120% of reference*TICI grade             | 1.04 (0.75–1.44)        | 0.818 | 1.09 (0.81–1.48)       | 0.550 |
| Rate of BP >120% at TICI 0-2a                        | 0.71 (0.50–1.02)        | -     | 0.85 (0.63–1.15)       | -     |
| Rate of BP >120% at TICI 2b-3                        | 0.73 (0.57–0.94)        | -     | 0.77 (0.65–0.93)       | -     |
| Rate of BP <80% of reference*TICI grade              | 0.87 (0.64–1.18)        | 0.365 | 0.87 (0.61–1.25)       | 0.456 |
| Rate of BP <80% at TICI 0-2a                         | 0.95 (0.70–1.27)        | -     | 1.00 (0.70–1.42)       | -     |
| Rate of BP <80% at TICI 2b-3                         | 1.06 (0.85–1.33)        | -     | 1.15 (0.90–1.46)       | -     |

Supplementary Table 3. Continued

| Model                                                                                           | Systolic blood pressure |        | Mean arterial pressure |       |
|-------------------------------------------------------------------------------------------------|-------------------------|--------|------------------------|-------|
|                                                                                                 | GMR (95% CI)            | P      | GMR (95% CI)           | P     |
| TICI grade 2b-3 (vs. 0-2a)                                                                      | 0.45 (0.23-0.90)        | 0.023  | 0.50 (0.25-0.96)       | 0.039 |
| Reference BP (by 10 mm Hg)                                                                      | 1.01 (0.77-1.32)        | 0.961  | 0.80 (0.54-1.20)       | 0.284 |
| Procedure mean BP (by 10 mm Hg) <sup>†</sup><br>(other effects were closely similar to A and B) | 0.92 (0.70-1.21)        | 0.539  | 1.04 (0.70-1.55)       | 0.827 |
| Model fit statistics (-2ResLL, AIC, BIC)                                                        | 685.14, 719.14, 770.09  |        | 676.94, 710.94, 761.89 |       |
| Full D: with BP*TICI interactions                                                               |                         |        |                        |       |
| Rate of BP >120% of reference (by 1/10 min)                                                     | 0.72 (0.57-0.92)        | 0.009  | 0.79 (0.66-0.94)       | 0.007 |
| Rate of BP <80% of reference (by 1/10 min)                                                      | 1.00 (0.83-1.27)        | 0.809  | 1.11 (0.88-1.39)       | 0.372 |
| TICI grade 2b-3 (vs. 0-2a)                                                                      | 0.48 (0.25-0.94)        | 0.033  | 0.51 (0.26-1.00)       | 0.050 |
| Reference BP*TICI grade                                                                         | 0.92 (0.67-1.26)        | 0.619  | 0.91 (0.56-1.47)       | 0.704 |
| Reference BP at TICI 0-2a                                                                       | 0.95 (0.68-1.33)        | -      | 0.75 (0.46-1.22)       | -     |
| Reference BP at TICI 2b-3                                                                       | 1.03 (0.77-1.39)        | -      | 0.82 (0.52-1.28)       | -     |
| Procedure mean*BP TICI grade                                                                    | 1.02 (0.66-1.58)        | 0.916  | 1.00 (0.54-1.86)       | 0.998 |
| Procedure mean BP at TICI 0-2a                                                                  | 0.93 (0.61-1.41)        | -      | 1.05 (0.59-1.86)       | -     |
| Procedure mean BP at TICI 2b-3<br>(other effects were closely similar to A and B)               | 0.91 (0.67-1.22)        | -      | 1.05 (0.67-1.63)       | -     |
| Model fit statistics (-2ResLL, AIC, BIC)                                                        | 694.74, 728.74, 779.69  |        | 685.49, 719.49, 770.44 |       |
| Reduced <sup>§</sup>                                                                            |                         |        |                        |       |
| Default independent variables                                                                   |                         |        |                        |       |
| Rate of BP >120% of reference (by 1/10 min)                                                     | 0.72 (0.60-0.87)        | <0.001 | 0.75 (0.63-0.90)       | 0.002 |
| Rate of BP <80% of reference (by 1/10 min)                                                      | 1.06 (0.91-1.25)        | 0.443  | 1.10 (0.93-1.31)       | 0.265 |
| Reference BP (by 10 mm Hg)                                                                      | 1.01 (0.85-1.19)        | 0.911  | 0.86 (0.69-1.07)       | 0.181 |
| Rate of BP excursions >120%*reference BP                                                        | 0.86 (0.78-0.96)        | 0.006  | 0.95 (0.86-1.04)       | 0.264 |
| On-admission NIHSS score (by 1 point)                                                           | 1.06 (1.01-1.11)        | 0.014  | 1.06 (1.01-1.10)       | 0.021 |
| TICI grade 2b-3 (vs. 0-2a)                                                                      | 0.36 (0.20-0.67)        | 0.001  | 0.36 (0.20-0.67)       | 0.042 |
| Affected vessel: MCA1 vs. other                                                                 | 0.65 (0.36-1.17)        | 0.153  | 0.72 (0.40-1.29)       | 0.270 |
| Collaterals ≥50% as unaffected side (vs. no)                                                    | 0.33 (0.16-0.68)        | 0.002  | 0.33 (0.16-0.67)       | 0.003 |
| Selected independent variables <sup>‡</sup>                                                     |                         |        |                        |       |
| Men (vs. women)                                                                                 | 1.84 (1.07-3.17)        | 0.028  | 1.78 (1.03-3.07)       | 0.038 |
| Model fit statistics (-2ResLL, AIC, BIC)                                                        | 666.00, 688.00, 721.41  |        | 666.27, 688.27, 721.68 |       |

Two types of models (each separately for systolic and mean arterial pressure) were fitted: "full" (with different interaction terms) and "reduced" (effects based on biological and statistical plausibility). Effects are GMRs (lesion volume was ln-transformed). GMRs for the interaction terms indicate whether the BP excursion effects were conditional on reference BP; or whether BP excursion effects and the effects of reference and procedure mean BP were conditional on the level of reperfusion (TICI grade).

BP, blood pressure; EVT, endovascular thrombectomy; GMR, geometric means ratio; CI, confidence interval; NIHSS, National Institutes of Health Stroke Scale; TICI, Thrombolysis in Cerebral Infarction; MCA, middle cerebral artery (segment 1 or 2); -2ResLL, 2 residual logarithmic likelihood; AIC, Akaike information criterion; BIC, Bayesian information criterion.

\*The asterisk is a part of the interaction term; <sup>†</sup>Weighted mean as area under the BP-time curve divided by the time period covered; <sup>‡</sup>By stepwise selection procedure ( $P < 0.200$  to enter/stay) among: age, sex, comorbidities, use of sympathomimetics during EVT, stroke etiology, time since symptom onset till the first vessel image, use of recombinant tissue plasminogen activator, pre-index stroke statin, antiplatelet or anticoagulant use; <sup>§</sup>Reduced model excluded interaction terms if no indication of moderation (for either systolic BP or mean arterial pressure), use of antihypertensives before EVT (highly insignificant and small number of treated patients), procedure mean BP (highly insignificant, determined by excursion rates, see Supplementary Analysis of Blood Pressure), procedure duration and number of BP measurements taken (highly insignificant). Affected vessel was dichotomized (MCA1/other).
