# Supplementary material for: Higher Blood Pressure during Endovascular Thrombectomy in Anterior Circulation Stroke Is Associated with Better Outcomes
Source: PubMed Central journal article supplement — J Stroke. 2018 Sep 30;20(3):373–84. doi: 10.5853/jos.2018.01305 (PMC6186925; doi:10.5853/jos.2018.01305), 2018-09-30
Supplement: jos-2018-01305-suppl4.pdf [file jos-2018-01305-suppl4.pdf]

**Supplementary Table 4.** Relationship between BP/BP excursions during EVT to values exceeding  $\pm 20\%$  of the reference value and finding of hemorrhages on post-procedure computed tomography scans

| Model                                               | Systolic blood pressure |       | Mean arterial pressure  |       |
|-----------------------------------------------------|-------------------------|-------|-------------------------|-------|
|                                                     | OR (95% CI)             | P     | OR (95% CI)             | P     |
| Full A: no interactions                             |                         |       |                         |       |
| Default independent variables                       |                         |       |                         |       |
| Rate of BP >120% of reference (by 1/10 min)         | 1.07 (0.72–1.52)        | 0.714 | 1.14 (0.82–1.57)        | 0.412 |
| Rate of BP <80% of reference (by 1/10 min)          | 0.78 (0.55–1.06)        | 0.118 | 0.74 (0.49–1.06)        | 0.101 |
| Reference BP (by 10 mm Hg)                          | 1.56 (1.03–2.45)        | 0.036 | 2.00 (1.05–4.10)        | 0.034 |
| Procedure mean BP (by 10 mm Hg) <sup>†</sup>        | 0.62 (0.38–0.94)        | 0.026 | 0.50 (0.24–0.94)        | 0.030 |
| Procedure duration (by 10 min)                      | 0.98 (0.67–1.08)        | 0.794 | 0.98 (0.67–1.08)        | 0.814 |
| BP measurements taken (by 10)                       | 1.05 (0.92–1.57)        | 0.561 | 1.04 (0.91–1.55)        | 0.585 |
| On-admission NIHSS score (by 1 point)               | 1.02 (0.94–1.11)        | 0.629 | 1.02 (0.94–1.11)        | 0.567 |
| TICI grade 2b-3 (vs. 0-2a)                          | 0.76 (0.28–2.10)        | 0.590 | 0.74 (0.28–2.04)        | 0.560 |
| Use of rtPA (vs. no)                                | 0.76 (0.29–2.04)        | 0.572 | 0.78 (0.30–2.10)        | 0.609 |
| Collaterals $\geq 50\%$ as unaffected side (vs. no) | 0.65 (0.23–1.92)        | 0.425 | 0.61 (0.22–1.79)        | 0.355 |
| Antihypertensives before EVT (vs. no)               | 1.52 (0.31–5.87)        | 0.576 | 1.59 (0.32–6.14)        | 0.539 |
| Selected independent variables <sup>‡</sup>         |                         |       |                         |       |
| Cardioembolic/unknown etiology (vs. LAA)            | 4.15 (0.91–35.1)        | 0.068 | 3.94 (0.87–33.9)        | 0.079 |
| History of coronary artery disease                  | 2.40 (0.92–6.19)        | 0.074 | 2.40 (0.91–6.22)        | 0.075 |
| Model fit statistics (LL, AIC, BIC)                 | -68.059, 164.11, 207.52 |       | -68.578, 165.15, 208.55 |       |
| Full B: with excursions*reference interactions      |                         |       |                         |       |
| Default independent variables                       |                         |       |                         |       |
| Rate of BP >120% of reference (by 1/10 min)         | 1.27 (0.82–1.90)        | 0.265 | 1.29 (0.81–1.98)        | 0.265 |
| Rate of BP <80% of reference (by 1/10 min)          | 0.94 (0.55–1.53)        | 0.821 | 0.97 (0.59–1.49)        | 0.900 |
| Reference BP (by 10 mm Hg)                          | 1.61 (1.04–2.59)        | 0.033 | 2.31 (1.19–4.87)        | 0.014 |
| Rate of BP excursions >120%*reference BP            | 1.20 (0.94–1.64)        | 0.153 | 1.05 (0.87–1.32)        | 0.641 |
| Rate of BP excursions <80%*reference BP             | 0.94 (0.84–1.04)        | 0.269 | 0.86 (0.63–1.02)        | 0.088 |
| Procedure mean BP (by 10 mm Hg) <sup>†</sup>        | 0.56 (0.33–0.87)        | 0.009 | 0.46 (0.21–0.90)        | 0.023 |
| Procedure duration (by 10 min)                      | 0.99 (0.67–1.08)        | 0.868 | 0.99 (0.65–1.08)        | 0.832 |
| BP measurements taken (by 10)                       | 1.06 (0.92–1.59)        | 0.467 | 1.06 (0.92–1.61)        | 0.474 |
| On-admission NIHSS score (by 1 point)               | 1.03 (0.95–1.12)        | 0.528 | 1.03 (0.95–1.12)        | 0.489 |
| TICI grade 2b-3 (vs. 0-2a)                          | 0.71 (0.26–2.03)        | 0.529 | 0.76 (0.28–2.08)        | 0.583 |
| Use of rtPA (vs. no)                                | 0.85 (0.32–2.35)        | 0.748 | 0.85 (0.33–2.34)        | 0.748 |
| Collaterals $\geq 50\%$ as unaffected side (vs. no) | 0.75 (0.26–2.31)        | 0.599 | 0.66 (0.23–1.98)        | 0.444 |
| Antihypertensives before EVT (vs. no)               | 1.28 (0.25–5.16)        | 0.745 | 1.66 (0.32–6.71)        | 0.512 |
| Selected independent variables <sup>‡</sup>         |                         |       |                         |       |
| Cardioembolic/unknown etiology (vs. LAA)            | 4.82 (0.94–47.4)        | 0.061 | 5.31 (1.04–53.3)        | 0.045 |
| History of coronary artery disease                  | 2.45 (0.93–6.42)        | 0.059 | 2.70 (1.01–7.21)        | 0.036 |
| Model fit statistics (LL, AIC, BIC)                 | -66.167, 164.33, 213.93 |       | -66.931, 165.86, 215.46 |       |
| Full C: with excursions*TICI interactions           |                         |       |                         |       |
| Rate of BP >120% of reference*TICI grade            | 1.69 (0.82–5.34)        | 0.170 | 1.41 (0.77–3.70)        | 0.303 |
| Rate of BP >120% at TICI 0-2a                       | 0.71 (0.30–1.67)        | -     | 0.84 (0.40–1.80)        | -     |
| Rate of BP >120% at TICI 2b-3                       | 1.21 (0.82–1.77)        | -     | 1.19 (0.86–1.65)        | -     |
| Rate of BP <80% of reference*TICI grade             | 0.87 (0.54–1.41)        | 0.558 | 0.61 (0.25–1.13)        | 0.122 |
| Rate of BP <80% at TICI 0-2a                        | 0.86 (0.57–1.31)        | -     | 0.96 (0.60–1.52)        | -     |
| Rate of BP <80% at TICI 2b-3                        | 0.75 (0.51–1.11)        | -     | 0.59 (0.32–1.09)        | -     |

Supplementary Table 4. Continued

| Model                                                                                           | Systolic blood pressure |       | Mean arterial pressure  |       |
|-------------------------------------------------------------------------------------------------|-------------------------|-------|-------------------------|-------|
|                                                                                                 | OR (95% CI)             | P     | OR (95% CI)             | P     |
| TICI grade 2b-3 (vs. 0-2a)                                                                      | 0.97 (0.32-2.95)        | 0.958 | 0.89 (0.30-2.64)        | 0.828 |
| Reference BP (by 10 mm Hg)                                                                      | 1.51 (0.99-2.40)        | 0.053 | 1.91 (0.99-3.97)        | 0.052 |
| Procedure mean BP (by 10 mm Hg) <sup>†</sup><br>(other effects were closely similar to A and B) | 0.63 (0.38-0.95)        | 0.029 | 0.53 (0.25-0.99)        | 0.048 |
| Model fit statistics (LL, AIC, BIC)                                                             | -66.756, 165.51, 215.11 |       | -66.285, 164.56, 214.17 |       |
| Full D: with BP*TICI interactions                                                               |                         |       |                         |       |
| Rate of BP >120% of reference (by 1/10 min)                                                     | 1.06 (0.71-1.51)        | 0.763 | 1.09 (0.78-1.52)        | 0.582 |
| Rate of BP <80% of reference (by 1/10 min)                                                      | 0.79 (0.55-1.09)        | 0.159 | 0.77 (0.49-1.11)        | 0.172 |
| TICI grade 2b-3 (vs. 0-2a)                                                                      | 0.87 (0.31-2.45)        | 0.799 | 0.91 (0.32-2.58)        | 0.853 |
| Reference BP*TICI grade                                                                         | 0.77 (0.45-1.26)        | 0.296 | 0.62 (0.26-1.37)        | 0.241 |
| Reference BP at TICI 0-2a                                                                       | 1.78 (1.07-2.95)        | -     | 2.45 (1.07-5.60)        | -     |
| Reference at TICI 2b-3                                                                          | 1.36 (0.83-2.23)        | -     | 1.53 (0.69-3.39)        | -     |
| Procedure mean BP*TICI grade                                                                    | 1.28 (0.66-2.64)        | 0.465 | 2.20 (0.79-7.32)        | 0.136 |
| Procedure mean BP at TICI 0-2a                                                                  | 0.55 (0.29-1.01)        | -     | 0.32 (0.12-0.87)        | -     |
| Procedure mean BP at TICI 2b-3<br>(other effects were closely similar to A and B)               | 0.70 (0.42-1.17)        | -     | 0.70 (0.32-1.54)        | -     |
| Model fit statistics (LL, AIC, BIC)                                                             | -67.499, 166.99, 216.60 |       | -67.439, 166.88, 216.48 |       |
| Reduced <sup>§</sup>                                                                            |                         |       |                         |       |
| Default independent variables                                                                   |                         |       |                         |       |
| Rate of BP >120% of reference (by 1/10 min)                                                     | 1.03 (0.72-1.48)        | 0.855 | 1.10 (0.82-1.50)        | 0.479 |
| Rate of BP <80% of reference (by 1/10 min)                                                      | 0.80 (0.58-1.11)        | 0.183 | 0.77 (0.53-1.12)        | 0.178 |
| Reference BP (by 10 mm Hg)                                                                      | 1.48 (0.99-2.28)        | 0.056 | 1.86 (1.00-3.47)        | 0.051 |
| Procedure mean BP (by 10 mm Hg) <sup>†</sup>                                                    | 0.65 (0.40-0.96)        | 0.032 | 0.52 (0.26-0.95)        | 0.034 |
| TICI grade 2b-3 (vs. 0-2a)                                                                      | 0.62 (0.25-1.53)        | 0.298 | 0.61 (0.25-1.50)        | 0.280 |
| Selected independent variables <sup>‡</sup>                                                     |                         |       |                         |       |
| Cardioembolic/unknown etiology (vs. LAA)                                                        | 3.61 (0.81-28.8)        | 0.095 | 3.51 (0.64-19.4)        | 0.149 |
| History of coronary heart disease                                                               | 2.58 (1.04-6.42)        | 0.041 | 2.56 (1.03-6.38)        | 0.043 |
| Model fit statistics (LL, AIC, BIC)                                                             | -69.109, 154.22, 179.02 |       | -69.792, 155.58, 180.38 |       |

Two types of models (each separately for systolic and mean arterial pressure) were fitted: "full" (with different interaction terms) and "reduced" (effects based on biological and statistical plausibility). Effects are ORs. ORs for the interaction terms indicate whether the BP excursion effects were conditional on reference BP; or whether BP excursion effects and the effects of reference and procedure mean BP were conditional on the level of reperfusion (TICI grade).

BP, blood pressure; EVT, endovascular thrombectomy; OR, odds ratio; CI, confidence interval; NIHSS, National Institutes of Health Stroke Scale; TICI, Thrombolysis in Cerebral Infarction; rtPA, recombinant tissue plasminogen activator; LAA, large artery atherosclerosis; LL, logarithmic likelihood; AIC, Akaike information criterion; BIC, Bayesian information criterion.

\*The asterisk is a part of the interaction term; <sup>†</sup>Weighted mean as area under the BP-time curve divided by the time period covered; <sup>‡</sup>By stepwise selection procedure ( $P < 0.200$  to enter/stay) among age, sex, comorbidities, use of sympathomimetics during EVT, stroke etiology, time since symptom onset till the first vessel image, type of affected vessel, pre-index stroke statin, antiplatelet or anticoagulant use; <sup>§</sup>Reduced model excluded interaction terms (no indication of qualitative moderation), use of antihypertensives before EVT (small number of treated patients & highly insignificant), existence of collaterals, use of rtPA, procedure duration and number of BP measurements taken since consistently highly insignificant.
