# Supplementary material for: Higher Blood Pressure during Endovascular Thrombectomy in Anterior Circulation Stroke Is Associated with Better Outcomes
Source: PubMed Central journal article supplement — J Stroke. 2018 Sep 30;20(3):373–84. doi: 10.5853/jos.2018.01305 (PMC6186925; doi:10.5853/jos.2018.01305), 2018-09-30
Supplement: jos-2018-01305-suppl5.pdf [file jos-2018-01305-suppl5.pdf]

**Supplementary Table 5.** Relationship between BP/BP excursions during EVT to values exceeding  $\pm 20\%$  of the reference value and favorable functional outcome at 3 months (mRS, score 0–2)

| Model                                                | Systolic blood pressure |        | Mean arterial pressure  |        |
|------------------------------------------------------|-------------------------|--------|-------------------------|--------|
|                                                      | OR (95% CI)             | P      | OR (95% CI)             | P      |
| <b>Full A: without interactions</b>                  |                         |        |                         |        |
| Default independent variables                        |                         |        |                         |        |
| Rate of BP >120% of reference (by 1/10 min)          | 1.49 (1.05–2.23)        | 0.024  | 1.57 (1.12–2.35)        | 0.007  |
| Rate of BP <80% of reference (by 1/10 min)           | 0.78 (0.54–1.07)        | 0.129  | 0.73 (0.47–1.05)        | 0.098  |
| Reference BP (by 10 mm Hg)                           | 1.63 (1.06–2.74)        | 0.023  | 2.29 (1.16–5.64)        | 0.014  |
| Procedure mean BP (by 10 mm Hg) <sup>†</sup>         | 0.78 (0.46–1.18)        | 0.262  | 0.59 (0.23–1.17)        | 0.145  |
| Procedure duration (by 10 min)                       | 0.84 (0.41–1.05)        | 0.321  | 0.77 (0.36–1.03)        | 0.205  |
| BP measurements taken (by 10)                        | 1.10 (0.85–2.28)        | 0.743  | 1.18 (0.84–2.54)        | 0.610  |
| On-admission NIHSS score (by 1 point)                | 0.86 (0.78–0.94)        | <0.001 | 0.87 (0.79–0.94)        | <0.001 |
| TICI grade 2b–3 (vs. 0–2a)                           | 3.14 (1.03–10.7)        | 0.043  | 2.74 (0.88–9.43)        | 0.082  |
| Collaterals $\geq 50\%$ as unaffected side (vs. no)  | 4.89 (1.48–19.1)        | 0.008  | 4.81 (1.44–18.9)        | 0.009  |
| Antihypertensive before EVT (vs. no)                 | 0.81 (0.19–3.23)        | 0.763  | 0.81 (0.19–3.27)        | 0.767  |
| Selected independent variables <sup>†</sup>          |                         |        |                         |        |
| Cardioembolic/unknown etiology (vs. LAA)             | 0.23 (0.06–0.82)        | 0.022  | 0.19 (0.04–0.72)        | 0.013  |
| Pre-index stroke statin use                          | 5.73 (1.58–25.1)        | 0.007  | 4.66 (1.27–20.5)        | 0.019  |
| Post-index stroke statin use                         | 0.30 (0.10–0.79)        | 0.014  | 0.30 (0.11–0.79)        | 0.015  |
| Age (by 10 yr)                                       | 0.74 (0.51–1.04)        | 0.101  | 0.78 (0.54–1.09)        | 0.143  |
| Model fit statistics (LL, AIC, BIC)                  | –71.406, 172.81, 218.46 |        | –70.405, 170.81, 216.46 |        |
| <b>Full B: with excursions*reference interaction</b> |                         |        |                         |        |
| Default independent variables                        |                         |        |                         |        |
| Rate of BP >120% of reference (by 1/10 min)          | 1.55 (1.01–2.47)        | 0.043  | 1.59 (1.03–2.64)        | 0.034  |
| Rate of BP <80% of reference (by 1/10 min)           | 0.89 (0.55–1.40)        | 0.624  | 0.74 (0.44–1.15)        | 0.192  |
| Reference BP (by 10 mm Hg)                           | 1.72 (1.09–3.01)        | 0.017  | 2.30 (1.13–5.84)        | 0.019  |
| Rate of BP excursions >120%*reference BP             | 1.00 (0.85–1.18)        | 0.995  | 1.01 (0.84–1.24)        | 0.948  |
| Rate of BP excursions <80%*reference BP              | 0.97 (0.89–1.05)        | 0.409  | 1.00 (0.89–1.13)        | 0.969  |
| Procedure mean BP (by 10 mm Hg) <sup>†</sup>         | 0.76 (0.44–1.17)        | 0.228  | 0.59 (0.23–1.18)        | 0.150  |
| Procedure duration (by 10 min)                       | 0.81 (0.38–1.04)        | 0.291  | 0.77 (0.36–1.04)        | 0.216  |
| BP measurements taken (by 10)                        | 1.14 (0.85–2.44)        | 0.672  | 1.18 (0.84–2.55)        | 0.616  |
| On-admission NIHSS score (by 1 point)                | 0.86 (0.78–0.94)        | <0.001 | 0.87 (0.79–0.94)        | <0.001 |
| TICI grade 2b–3 (vs. 0–2a)                           | 3.16 (1.03–10.8)        | 0.043  | 2.73 (0.88–9.48)        | 0.084  |
| Collaterals $\geq 50\%$ as unaffected side (vs. no)  | 5.53 (1.61–23.0)        | 0.006  | 4.84 (1.43–19.4)        | 0.011  |
| Antihypertensive before EVT (vs. no)                 | 0.78 (0.18–3.15)        | 0.728  | 0.81 (0.19–3.29)        | 0.768  |
| Selected independent variables <sup>†</sup>          |                         |        |                         |        |
| Cardioembolic/unknown etiology (vs. LAA)             | 0.24 (0.06–0.85)        | 0.027  | 0.19 (0.04–0.74)        | 0.015  |
| Pre-index stroke statin use                          | 5.70 (1.59–24.4)        | 0.007  | 4.67 (1.27–20.7)        | 0.019  |
| Post-index stroke statin use                         | 0.29 (0.10–0.78)        | 0.003  | 0.30 (0.11–0.80)        | 0.015  |
| Age (by 10 yr)                                       | 0.74 (0.51–1.04)        | 0.087  | 0.78 (0.54–1.09)        | 0.148  |
| Model fit statistics (LL, AIC, BIC)                  | –71.059, 176.12, 227.86 |        | –70.402, 174.80, 226.54 |        |
| <b>Full C: with excursions*TICI interaction</b>      |                         |        |                         |        |
| Rate of BP >120% of reference*TICI grade             | 7.72 (1.12–53.3)        | 0.038  | 2.44 (0.84–6.63)        | 0.080  |
| Rate of BP >120% at TICI 0–2a                        | 0.27 (0.04–1.75)        | -      | 0.74 (0.28–1.99)        | -      |
| Rate of BP >120% at TICI 2b–3                        | 2.10 (1.25–3.51)        | -      | 1.81 (1.19–2.75)        | -      |
| Rate of BP <80% of reference*TICI grade              | 1.15 (0.70–1.89)        | 0.589  | 1.06 (0.57–1.96)        | 0.865  |

Supplementary Table 5. Continued

| Model                                                                             | Systolic blood pressure |        | Mean arterial pressure  |        |
|-----------------------------------------------------------------------------------|-------------------------|--------|-------------------------|--------|
|                                                                                   | OR (95% CI)             | P      | OR (95% CI)             | P      |
| Rate of BP <80% at TICl 0-2a                                                      | 0.71 (0.41-1.22)        | -      | 0.74 (0.39-1.40)        | -      |
| Rate of BP <80% at TICl 2b-3                                                      | 0.82 (0.55-1.20)        | -      | 0.78 (0.51-1.17)        | -      |
| Reference BP (by 10 mm Hg)                                                        | 1.62 (1.02-2.79)        | 0.038  | 2.12 (1.08-5.12)        | 0.028  |
| Procedure mean BP (by 10 mm Hg) <sup>†</sup>                                      | 0.78 (0.45-1.21)        | 0.292  | 0.65 (0.26-1.28)        | 0.238  |
| TICl grade 2b-3 (vs. 0-2a)<br>(other effects were closely similar to A and B)     | 7.36 (1.15-47.1)        | 0.035  | 3.67 (0.97-13.9)        | 0.056  |
| Model fit statistics (LL, AIC, BIC)                                               | -66.396, 166.79, 218.53 |        | -67.909, 169.82, 221.56 |        |
| Full D: with BP*TICl interaction                                                  |                         |        |                         |        |
| Rate of BP >120% of reference (by 1/10 min)                                       | 1.56 (1.03-2.38)        | 0.037  | 1.62 (1.08-2.41)        | 0.019  |
| Rate of BP <80% of reference (by 1/10 min)                                        | 0.77 (0.53-1.11)        | 0.182  | 0.74 (0.49-1.12)        | 0.153  |
| TICl grade 2b-3 (vs. 0-2a)                                                        | 3.60 (1.09-11.8)        | 0.035  | 3.17 (0.93-10.8)        | 0.065  |
| Reference BP*TICl grade                                                           | 0.71 (0.42-1.19)        | 0.191  | 0.51 (0.21-1.21)        | 0.125  |
| Reference BP at TICl 0-2a                                                         | 2.16 (1.09-4.29)        | -      | 3.97 (1.29-12.3)        | -      |
| Reference BP at TICl 2b-3                                                         | 1.53 (0.92-2.55)        | -      | 2.02 (0.88-4.61)        | -      |
| Procedure mean BP*TICl grade                                                      | 1.45 (0.71-1.99)        | 0.310  | 2.76 (0.85-8.98)        | 0.093  |
| Procedure mean BP at TICl 0-2a                                                    | 0.57 (0.26-1.29)        | -      | 0.26 (0.07-1.01)        | -      |
| Procedure mean BP at TICl 2b-3<br>(other effects were closely similar to A and B) | 0.84 (0.50-1.39)        | -      | 0.72 (0.30-1.73)        | -      |
| Model fit statistics (LL, AIC, BIC)                                               | -70.385, 174.77, 226.51 |        | -68.755, 171.51, 223.25 |        |
| Reduced A: no interactions, no CT findings <sup>§</sup>                           |                         |        |                         |        |
| Default independent variables                                                     |                         |        |                         |        |
| Rate of BP >120% of reference (by 1/10 min)                                       | 1.44 (1.04-2.06)        | 0.026  | 1.38 (1.03-1.83)        | 0.023  |
| Rate of BP <80% of reference (by 1/10 min)                                        | 0.78 (0.57-1.05)        | 0.101  | 0.84 (0.64-1.10)        | 0.193  |
| Reference BP (by 10 mm Hg)                                                        | 1.58 (1.07-2.48)        | 0.022  | 1.75 (1.00-3.07)        | 0.042  |
| Procedure mean BP (by 10 mm Hg) <sup>†</sup>                                      | 0.84 (0.56-1.21)        | 0.360  | 0.80 (0.47-1.36)        | 0.405  |
| On-admission NIHSS score (by 1 point)                                             | 0.86 (0.78-0.93)        | <0.001 | 0.86 (0.79-0.94)        | <0.001 |
| TICl grade 2b-3 (vs. 0-2a)                                                        | 4.12 (1.44-13.3)        | 0.008  | 3.85 (1.29-11.5)        | 0.011  |
| Collaterals ≥50% as unaffected side (vs. no)                                      | 4.81 (1.53-17.6)        | 0.007  | 4.81 (1.43-16.1)        | 0.007  |
| Selected independent variables <sup>‡</sup>                                       |                         |        |                         |        |
| Cardioembolic/unknown etiology (vs. LAA)                                          | 0.27 (0.07-0.92)        | 0.036  | 0.27 (0.07-0.97)        | 0.035  |
| Pre-index stroke statin use                                                       | 5.77 (1.64-24.2)        | 0.005  | 4.55 (1.24-16.7)        | 0.015  |
| Post-index stroke statin use                                                      | 0.29 (0.11-0.75)        | 0.010  | 0.31 (0.12-0.81)        | 0.013  |
| Age (by 10 yr)                                                                    | 0.69 (0.49-0.94)        | 0.020  | 0.72 (0.52-0.99)        | 0.037  |
| Model fit statistics (LL, AIC, BIC)                                               | -73.084, 170.17, 206.69 |        | -70.405, 170.81, 216.46 |        |
| Reduced B: no interactions, with CT findings <sup>§</sup>                         |                         |        |                         |        |
| Default independent variables                                                     |                         |        |                         |        |
| Rate of BP >120% of reference (by 1/10 min)                                       | 1.40 (0.98-2.06)        | 0.059  | 1.31(0.96-1.80)         | 0.079  |
| Rate of BP <80% of reference (by 1/10 min)                                        | 0.81 (0.57-1.11)        | 0.190  | 0.88 (0.66-1.18)        | 0.387  |
| Reference BP (by 10 mm Hg)                                                        | 1.56 (1.01-2.60)        | 0.042  | 1.61 (0.87-2.99)        | 0.111  |
| Procedure mean BP (by 10 mm Hg) <sup>†</sup>                                      | 0.83 (0.52-1.24)        | 0.363  | 0.80 (0.44-1.44)        | 0.443  |
| On-admission NIHSS score (by 1 point)                                             | 0.87 (0.79-0.95)        | 0.002  | 0.88 (0.81-0.96)        | 0.004  |
| TICl grade 2b-3 (vs. 0-2a)                                                        | 3.02 (0.95-10.6)        | 0.061  | 2.78 (0.86-8.97)        | 0.080  |
| Collaterals ≥50% as unaffected side (vs. no)                                      | 3.12 (0.91-12.2)        | 0.071  | 3.27 (0.90-11.9)        | 0.061  |
| Ischemic lesion volume (by 2.718-fold)                                            | 0.62 (0.46-0.80)        | <0.001 | 0.62 (0.47-0.82)        | <0.001 |
| Post-procedure visible hemorrhages (vs. no)                                       | 1.87 (0.55-6.34)        | 0.314  | 1.88 (0.57-6.22)        | 0.298  |

Supplementary Table 5. Continued

| Model                                                    | Systolic blood pressure |        | Mean arterial pressure  |        |
|----------------------------------------------------------|-------------------------|--------|-------------------------|--------|
|                                                          | OR (95% CI)             | P      | OR (95% CI)             | P      |
| Selected independent variables <sup>†</sup>              |                         |        |                         |        |
| Cardioembolic/unknown etiology (vs. LAA)                 | 0.18 (0.04–0.68)        | 0.011  | 0.17 (0.04–0.70)        | 0.009  |
| Pre-index stroke statin use                              | 3.62 (0.97–15.7)        | 0.055  | 3.19 (0.82–12.5)        | 0.082  |
| Post-index stroke statin use                             | 0.31 (0.11–0.82)        | 0.018  | 0.31 (0.11–0.84)        | 0.017  |
| Age (by 10 yr)                                           | 0.62 (0.42–0.87)        | 0.005  | 0.72 (0.52–0.99)        | 0.008  |
| Model fit statistics (LL, AIC, BIC)                      | –66.213, 160.42, 203.03 |        | –67.075, 162.15, 204.76 |        |
| Reduced C: with interaction, no CT findings <sup>§</sup> |                         |        |                         |        |
| Default independent variables                            |                         |        |                         |        |
| Rate of BP >120% of reference*TIICl grade                | 8.03 (1.19–54.3)        | 0.033  | 2.64 (0.98–7.05)        | 0.053  |
| Rate of BP >120% at TIICl 0–2a                           | 0.25 (0.04–1.56)        | -      | 0.62 (0.24–1.59)        | -      |
| Rate of BP >120% at TIICl 2b–3                           | 1.98 (1.24–3.17)        | -      | 1.64 (1.15–2.33)        | -      |
| Rate of BP <80% of reference (by 1/10 min)               | 0.81 (0.59–1.11)        | 0.182  | 0.80 (0.57–1.12)        | 0.202  |
| Reference BP (by 10 mm Hg)                               | 1.54 (1.00–2.38)        | 0.048  | 1.81 (1.01–3.62)        | 0.046  |
| Procedure mean BP (by 10 mm Hg) <sup>†</sup>             | 0.86 (0.59–1.26)        | 0.447  | 0.80 (0.45–1.43)        | 0.458  |
| On-admission NIHSS score (by 1 point)                    | 0.84 (0.76–0.92)        | <0.001 | 0.86 (0.79–0.94)        | <0.001 |
| TIICl grade 2b–3 (vs. 0–2a)                              | 11.1 (1.84–66.2)        | 0.008  | 5.30 (1.49–18.8)        | 0.010  |
| Collaterals ≥50% as unaffected side (vs. no)             | 5.07 (1.47–17.5)        | 0.010  | 5.78 (1.68–19.9)        | 0.005  |
| Selected independent variables <sup>†</sup>              |                         |        |                         |        |
| Cardioembolic/unknown etiology (vs. LAA)                 | 0.28 (0.07–1.12)        | 0.071  | 0.27 (0.07–1.07)        | 0.062  |
| Pre-index stroke statin use                              | 6.26 (1.52–25.7)        | 0.011  | 4.48 (1.18–17.1)        | 0.028  |
| Post-index stroke statin use                             | 0.25 (0.09–0.69)        | 0.007  | 0.28 (0.10–0.74)        | 0.011  |
| Age (by 10 yr)                                           | 0.66 (0.47–0.93)        | 0.018  | 0.67 (0.45–0.95)        | 0.025  |
| Model fit statistics (LL, AIC, BIC)                      | –68.076, 162.15, 201.72 |        | –70.079, 166.16, 205.72 |        |
| Reduced D: with interaction and CT findings <sup>§</sup> |                         |        |                         |        |
| Default independent variables                            |                         |        |                         |        |
| Rate of BP >120% of reference*TIICl grade <sup>†</sup>   | 7.55 (0.91–62.3)        | 0.061  | 2.51 (0.92–6.81)        | 0.071  |
| Rate of BP >120% at TIICl 0–2a                           | 0.24 (0.03–1.89)        | -      | 0.61 (0.23–1.59)        | -      |
| Rate of BP >120% at TIICl 2b–3                           | 1.84 (1.13–3.00)        | -      | 1.53 (1.05–2.21)        | -      |
| Rate of BP <80% of reference (by 1/10 min)               | 0.83 (0.59–1.16)        | 0.272  | 0.83 (0.57–1.19)        | 0.312  |
| Reference BP (by 10 mm Hg)                               | 1.52 (0.90–2.53)        | 0.056  | 1.71 (0.90–3.73)        | 0.103  |
| Procedure mean BP (by 10 mm Hg) <sup>†</sup>             | 0.86 (0.56–1.30)        | 0.471  | 0.79 (0.41–1.52)        | 0.485  |
| On-admission NIHSS score (by 1 point)                    | 0.86 (0.78–0.96)        | 0.005  | 0.88 (0.80–0.97)        | 0.007  |
| TIICl grade 2b–3 (vs. 0–2a)                              | 8.21 (1.07–62.8)        | 0.042  | 3.70 (0.95–14.4)        | 0.059  |
| Collaterals ≥50% as unaffected side (vs. no)             | 3.33 (0.90–12.3)        | 0.072  | 3.88 (1.05–14.3)        | 0.042  |
| Ischemic lesion volume (by 2.718-fold)                   | 0.63 (0.48–0.83)        | 0.001  | 0.63 (0.48–0.84)        | 0.001  |
| Post-procedure visible hemorrhages (vs. no)              | 1.75 (0.50–6.15)        | 0.380  | 1.63 (0.48–5.54)        | 0.435  |
| Selected independent variables <sup>†</sup>              |                         |        |                         |        |
| Cardioembolic/unknown etiology (vs. LAA)                 | 0.19 (0.04–0.91)        | 0.036  | 0.17 (0.04–0.77)        | 0.021  |
| Pre-index stroke statin use                              | 3.91 (0.91–16.8)        | 0.066  | 3.18 (0.79–12.9)        | 0.104  |
| Post-index stroke statin use                             | 0.25 (0.09–0.73)        | 0.011  | 0.28 (0.10–0.77)        | 0.013  |
| Age (by 10 yr)                                           | 0.60 (0.41–0.86)        | 0.006  | 0.60 (0.41–0.98)        | 0.009  |
| Model fit statistics (LL, AIC, BIC)                      | –62.144, 154.29, 199.94 |        | –64.446, 158.89, 204.54 |        |
| Final A: no interactions, no CT findings                 |                         |        |                         |        |
| Default independent variables                            |                         |        |                         |        |
| Rate of BP >120% of reference (by 1/10 min)              | 1.33 (1.01–1.76)        | 0.038  | 1.30 (1.01–1.66)        | 0.029  |

Supplementary Table 5. Continued

| Model                                        | Systolic blood pressure |        | Mean arterial pressure  |        |
|----------------------------------------------|-------------------------|--------|-------------------------|--------|
|                                              | OR (95% CI)             | P      | OR (95% CI)             | P      |
| Rate of BP <80% of reference (by 1/10 min)   | 0.85 (0.67–1.08)        | 0.174  | 0.85 (0.65–1.10)        | 0.218  |
| Reference BP (by 10 mm Hg)                   | 1.37 (1.06–1.77)        | 0.013  | 1.49 (1.06–2.08)        | 0.016  |
| On-admission NIHSS score (by 1 point)        | 0.85 (0.78–0.93)        | <0.001 | 0.86 (0.80–0.94)        | <0.001 |
| TICI grade 2b–3 (vs. 0–2a)                   | 3.96 (1.34–11.7)        | 0.009  | 3.72 (1.26–11.0)        | 0.013  |
| Collaterals ≥50% as unaffected side (vs. no) | 4.62 (1.45–11.2)        | 0.007  | 4.71 (1.44–15.4)        | 0.006  |
| Selected independent variables*              |                         |        |                         |        |
| Cardioembolic/unknown etiology (vs. LAA)     | 0.25 (0.07–0.90)        | 0.026  | 0.22 (0.06–0.84)        | 0.018  |
| Pre-index stroke statin use                  | 5.88 (1.55–22.3)        | 0.005  | 4.71 (1.27–17.5)        | 0.013  |
| Post-index stroke statin use                 | 0.32 (0.12–0.82)        | 0.015  | 0.34 (0.13–0.87)        | 0.020  |
| Age (by 10 yr)                               | 0.69 (0.50–0.96)        | 0.020  | 0.72 (0.52–0.99)        | 0.039  |
| Model fit statistics (LL, AIC, BIC)          | –73.504, 169.01, 202.48 |        | –73.544, 169.09, 202.56 |        |
| Final B: no interactions, with lesion volume |                         |        |                         |        |
| Default independent variables                |                         |        |                         |        |
| Rate of BP >120% of reference (by 1/10 min)  | 1.25 (0.95–1.71)        | 0.114  | 1.22 (0.95–1.61)        | 0.115  |
| Rate of BP <80% of reference (by 1/10 min)   | 0.88 (0.69–1.11)        | 0.291  | 0.89 (0.67–1.15)        | 0.371  |
| Reference BP (by 10 mm Hg)                   | 1.33 (1.02–1.77)        | 0.034  | 1.37 (0.97–1.97)        | 0.071  |
| On-admission NIHSS score (by 1 point)        | 0.87 (0.79–0.95)        | 0.002  | 0.88 (0.81–0.96)        | 0.003  |
| TICI grade 2b–3 (vs. 0–2a)                   | 2.73 (0.89–9.10)        | 0.079  | 2.55 (0.83–8.46)        | 0.101  |
| Collaterals ≥50% as unaffected side (vs. no) | 2.95 (0.88–11.2)        | 0.080  | 3.04 (0.91–11.5)        | 0.071  |
| Ischemic lesion volume (by 2.718-fold)       | 0.65 (0.50–0.83)        | <0.001 | 0.66 (0.50–0.84)        | <0.001 |
| Selected independent variables*              |                         |        |                         |        |
| Cardioembolic/unknown etiology (vs. LAA)     | 0.19 (0.05–0.69)        | 0.011  | 0.16 (0.04–0.62)        | 0.007  |
| Pre-index stroke statin use                  | 3.94 (1.08–16.8)        | 0.037  | 3.48 (0.97–14.8)        | 0.057  |
| Post-index stroke statin use                 | 0.34 (0.12–0.88)        | 0.026  | 0.33 (0.12–0.87)        | 0.025  |
| Age (by 10 yr)                               | 0.63 (0.43–0.87)        | 0.005  | 0.65 (0.45–0.90)        | 0.010  |
| Model fit statistics (LL, AIC, BIC)          | –67.354, 158.71, 195.23 |        | –67.863, 159.73, 196.25 |        |
| Final C: with interaction, no CT findings    |                         |        |                         |        |
| Default independent variables                |                         |        |                         |        |
| Rate of BP >120% of reference*TICI grade     | 8.42 (1.25–56.9)        | 0.029  | 2.80 (1.05–7.43)        | 0.039  |
| Rate of BP >120% at TICI 0–2a                | 0.22 (0.04–1.35)        | -      | 0.55 (0.23–1.36)        | -      |
| Rate of BP >120% at TICI 2b–3                | 1.84 (1.20–2.82)        | -      | 1.55 (1.12–2.14)        | -      |
| TICI grade 2b–3 (vs. 0–2a) at 0 rate         | 1.01 (0.25–3.97)        | -      | 1.33 (0.35–5.10)        | -      |
| TICI grade 2b–3 (vs. 0–2a) at 0.5/10 min     | 2.92 (0.92–9.27)        | -      | 2.23 (0.71–7.03)        | -      |
| TICI grade 2b–3 (vs. 0–2a) at 1.0/min        | 8.48 (1.69–42.6)        | -      | 3.73 (1.19–11.7)        | -      |
| TICI grade 2b–3 (vs. 0–2a) at mean rate      | 11.1 (1.84–66.2)        | 0.009  | 5.37 (1.52–18.9)        | 0.009  |
| Rate of BP <80% of reference (by 1/10 min)   | 0.87 (0.69–1.11)        | 0.257  | 0.87 (0.67–1.12)        | 0.285  |
| Reference BP (by 10 mm Hg)                   | 1.36 (1.04–1.78)        | 0.026  | 1.50 (1.06–2.12)        | 0.022  |
| On-admission NIHSS score (by 1 point)        | 0.84 (0.76–0.92)        | <0.001 | 0.86 (0.78–0.93)        | <0.001 |
| Collaterals ≥50% as unaffected side (vs. no) | 5.07 (1.47–17.5)        | 0.010  | 5.68 (1.67–19.4)        | 0.009  |
| Selected independent variables*              |                         |        |                         |        |
| Cardioembolic/unknown etiology (vs. LAA)     | 0.28 (0.07–1.12)        | 0.072  | 0.26 (0.06–1.03)        | 0.054  |
| Pre-index stroke statin use                  | 6.26 (1.52–25.7)        | 0.011  | 4.66 (1.22–17.8)        | 0.025  |
| Post-index stroke statin use                 | 0.25 (0.09–0.69)        | 0.007  | 0.29 (0.11–0.78)        | 0.014  |
| Age (by 10 yr)                               | 0.66 (0.47–0.93)        | 0.017  | 0.67 (0.48–0.95)        | 0.025  |
| Model fit statistics (LL, AIC, BIC)          | –68.374, 160.75, 197.27 |        | –70.370, 164.74, 201.26 |        |

Supplementary Table 5. Continued

| Model                                         | Systolic blood pressure |       | Mean arterial pressure  |       |
|-----------------------------------------------|-------------------------|-------|-------------------------|-------|
|                                               | OR (95% CI)             | P     | OR (95% CI)             | P     |
| Final D: with interaction, with lesion volume |                         |       |                         |       |
| Default independent variables                 |                         |       |                         |       |
| Rate of BP >120% of reference*TICI grade      | 7.86 (0.99–62.1)        | 0.051 | 2.73 (1.02–7.31)        | 0.046 |
| Rate of BP >120% at TICI 0–2a                 | 0.21 (0.03–1.55)        | -     | 0.53 (0.21–1.31)        | -     |
| Rate of BP >120% at TICI 2b–3                 | 1.67 (1.08–2.60)        | -     | 1.43 (1.03–2.01)        | -     |
| TICI grade 2b–3 (vs. 0–2a) at 0 rate          | 0.77 (0.18–3.20)        | -     | 0.94 (0.23–3.83)        | -     |
| TICI grade 2b–3 (vs. 0–2a) at 0.5/10 min      | 2.16 (0.62–7.56)        | -     | 1.55 (0.46–5.24)        | -     |
| TICI grade 2b–3 (vs. 0–2a) at 1.0/min         | 6.05 (0.99–36.6)        | -     | 2.56 (0.76–8.64)        | -     |
| TICI grade 2b–3 (vs. 0–2a) at mean rate       | 7.21 (1.29–59.1)        | 0.021 | 3.64 (0.96–13.8)        | 0.057 |
| Rate of BP <80% of reference (by 1/10 min)    | 0.89 (0.69–1.13)        | 0.341 | 0.89 (0.68–1.15)        | 0.389 |
| Reference BP (by 10 mm Hg)                    | 1.33 (1.01–1.79)        | 0.040 | 1.39 (0.98–2.02)        | 0.067 |
| On-admission NIHSS score (by 1 point)         | 0.86 (0.77–0.95)        | 0.002 | 0.88 (0.80–0.96)        | 0.004 |
| Collaterals ≥50% as unaffected side (vs. no)  | 3.35 (0.97–13.2)        | 0.056 | 3.81 (1.11–14.9)        | 0.033 |
| Ischemic lesion volume (by 2.718-fold)        | 0.66 (0.51–0.85)        | 0.001 | 0.66 (0.51–0.85)        | 0.001 |
| Selected independent variables†               |                         |       |                         |       |
| Cardioembolic/unknown etiology (vs. LAA)      | 0.22 (0.05–0.85)        | 0.028 | 0.19 (0.04–0.85)        | 0.015 |
| Pre-index stroke statin use                   | 4.28 (1.08–19.6)        | 0.038 | 3.44 (0.92–15.1)        | 0.068 |
| Post-index stroke statin use                  | 0.27 (0.09–0.74)        | 0.010 | 0.29 (0.10–0.78)        | 0.013 |
| Age (by 10 yr)                                | 0.61 (0.41–0.86)        | 0.004 | 0.61 (0.41–0.87)        | 0.005 |
| Model fit statistics (LL, AIC, BIC)           | –62.945, 151.89, 191.45 |       | –65.136, 156.27, 195.83 |       |

Three types of models (each separately for systolic and mean arterial pressure) were fitted: "full" (with different interaction terms), "reduced" and "final" (based on biological and statistical plausibility). Intermediate radiological outcomes were introduced to "reduced models". Effects are ORs. ORs for the interaction terms indicate whether the BP excursion effects were conditional on reference BP; or whether BP excursion effects and the effects of reference and procedure mean BP were conditional on the level of reperfusion (TICI grade).

BP, blood pressure; EVT, endovascular thrombectomy; mRS, modified Rankin Scale; OR, odds ratio; CI, confidence interval; NIHSS, National Institutes of Health Stroke Scale; TICI, Thrombolysis in Cerebral Infarction; LAA, large artery atherosclerosis; LL, logarithmic likelihood; AIC, Akaike information criterion; BIC, Bayesian information criterion; CT, computed tomography.

\*The asterisk is a part of the interaction term; †Weighted mean as area under the blood pressure-time curve divided by the time period covered; ‡By stepwise selection procedure ( $P < 0.200$  to enter/stay) among: age, sex, comorbidities (hypertension, atrial fibrillation, any form of occlusive arterial disease, diabetes, heart or renal failure), stroke etiology, type of the affected vessel, use of recombinant tissue plasminogen activator, time elapsed since symptom onset till first vessel image, pre- and post-index stroke use of statins, use of sympathomimetics during EVT; §Reduced models excluded interaction terms not indicative of qualitative moderation, use of antihypertensives before EVT (small number of treated patients & highly insignificant), procedure duration and number of BP measurements taken (consistently highly insignificant). Final models further excluded procedure mean BP (highly insignificant, determined by excursion rates, see Supplementary Analysis of Blood Pressure) and presence of post-procedure hemorrhages (consistently highly insignificant).
