# Supplementary material for: Higher Blood Pressure during Endovascular Thrombectomy in Anterior Circulation Stroke Is Associated with Better Outcomes
Source: PubMed Central journal article supplement — J Stroke. 2018 Sep 30;20(3):373–84. doi: 10.5853/jos.2018.01305 (PMC6186925; doi:10.5853/jos.2018.01305), 2018-09-30
Supplement: jos-2018-01305-suppl6.pdf [file jos-2018-01305-suppl6.pdf]

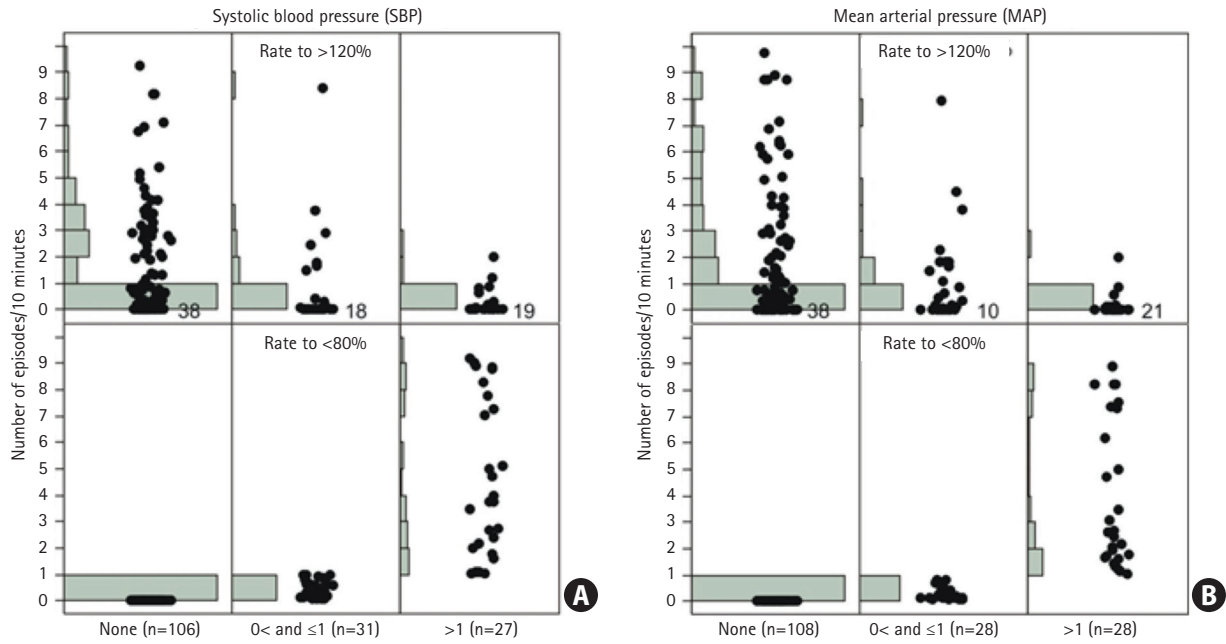

Patient categories by the rate of excursions to >120% and <80% of the reference (n/10 min)

**Supplementary Figure 1.** Rates of blood pressure excursions during endovascular procedure to >120% or to <80% of the reference. Patients are classified by the rate of episodes (n/10 minutes) to <80% as those with none, up to 1 and >1 episode/10 minutes, while actual rates are given on the y-axis: rates to >120% of the reference (upper panel) and to <80% of the reference (lower panel). Dots are individual data, shaded bars illustrate frequency of rates and numbers are counts of patients with no excursions to >120% of the reference.
